# Supplementary material for: Quantitative T1 mapping using multi-slice multi-shot inversion recovery EPI
Source: PubMed Central journal article supplement (PMC8204273; doi:10.1016/j.neuroimage.2021.117976), 2021-07-01
Supplement: mmc1.pdf [file mmc1.pdf]

## Supplementary material

### 1. MonteCarlo simulations: determining optimal number of acquisitions

Monte Carlo simulations of multi-shot MS-IR-EPI sequence for acquisitions MS2 (TR=3.2s, 70 slices, 7T) and MS5 (TR=4.5s, 96 slices, 3T) are shown in Figure 1. For the MS2 acquisition (Fig.1A), the standard deviation across the slices shows that there is a variation of the fitted  $T_1$  value across slices when using 3 and 4 TIs for WM, whereas in GM the variation is only obvious when using only 3 TIs. For the MS5 3T acquisition (Fig.1B), simulations show that when using 8 TIs the variation is small for both GM and WM.

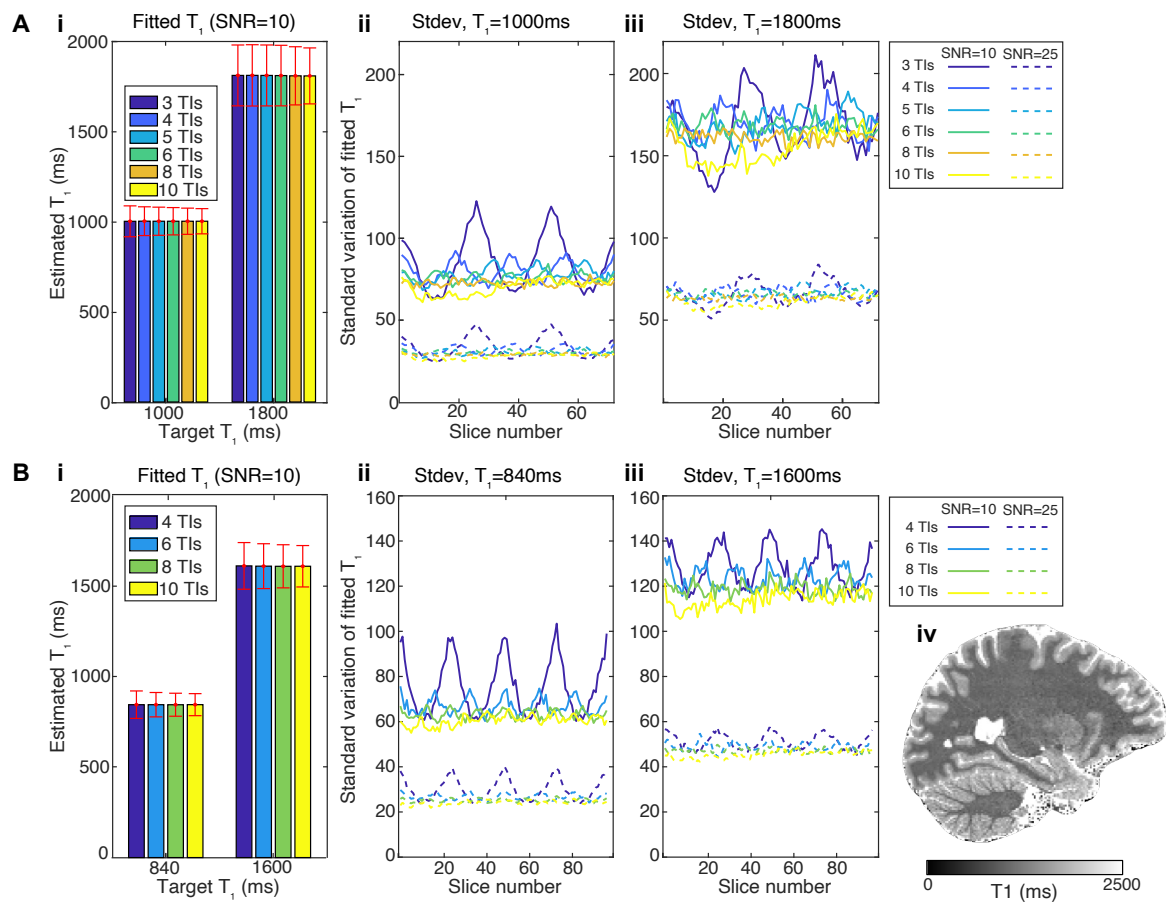

**Figure 1:** Monte Carlo simulations of multi-shot multi-slice inversion recovery EPI sequence for acquisitions with (A) TR=3.2s (72 slices, 7T) and (B) TR=4.5s (96 slices, 3T) showing the effect of number of acquisition/TIs (3,4,5,6,8,10) on fitted  $T_1$  parameters for a target  $T_1$  values typical of white and grey matter at 7T (A) and 3T (B). Gaussian distributed random noise (with SNR levels of 10 and 25) was added to the complex simulated data (with 1024 samples) which was fit, as for the experimental data, to obtain mean and standard deviation of fitted  $T_1$  values. (A) (i) The fitted  $T_1$  (mean across slices), for  $T_1$  targets of 1000 and 1800, remains constant but the standard deviation (error bars) decreases with increasing number of TIs. (ii) Standard deviation plot of the fitted  $T_1$ -values across slices for WM and (iii) for GM for SNR levels of 10 (solid line) and 25 (dash lines). (B) (i) Fitted  $T_1$  for targets of 840 and 1600ms, representative of WM and GM at 3T. Standard deviation of the fitted  $T_1$ -values for (ii) WM and (iii) GM across each of 96 slices. (iii) Sagittal reconstruction of the axial  $T_1$ -maps derived using 8 equally spaced TIs from a MS-IR-EPI acquisition with 1mm isotropic resolution. A SPIR fat suppression pulse with a low flip angle ( $FA=12^\circ$ ) was used to suppress the fat artefact.

## 2. Adiabatic inversion pulse: effect of efficiency on the accuracy of $T_1$

We simulated the error measured on  $T_1$  for three target values (1200, 1600 and 2000 ms) for different efficiency levels of the adiabatic inversion pulse (Figure 2). The red line shows no error for a perfect inversion (efficiency=1,  $180^\circ$ ) irrespectively of TR. When the inversion pulse is not perfect,  $T_1$  is overestimated but this error decreases with increasing TR: for efficiency=0.9 (corresponding to a flip angle of  $162^\circ$ ) the error for a target  $T_1$  of 1200ms ( $\sim$ WM at 7T) decreases from 20ms for a TR=1s to less than 10ms for TR>3s. Although this error increases for longer  $T_1$  target values, the error for target  $T_1$  of 2000ms remains low (10.7ms) for the TR (5s) used in our experiments.

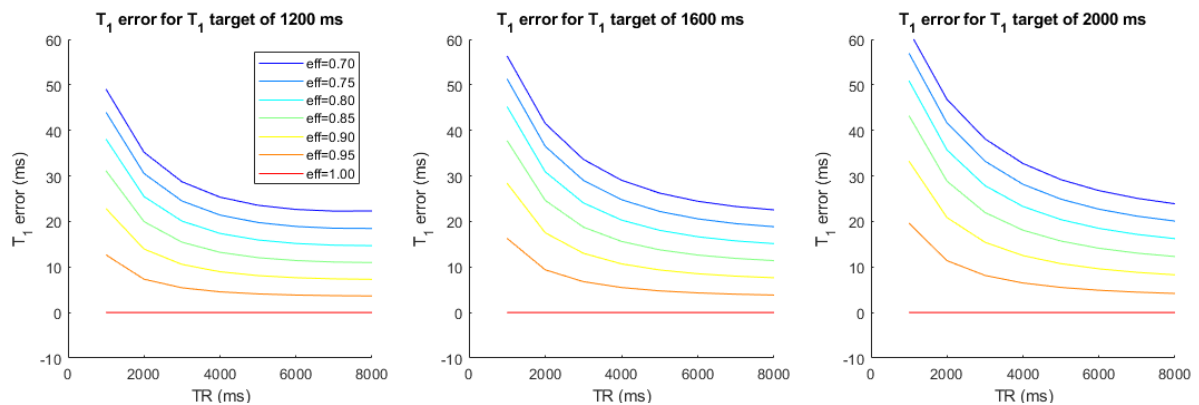

**Figure 2:** Simulations of the expected error in  $T_1$  measurements for target  $T_1$  values of 1200ms (left), 1600ms (middle) and 2000ms (right) as a function of TR for different levels of efficiency of the adiabatic inversion pulse, ranging from 1 (perfect inversion:  $180^\circ$  flip angle) to 0.7 ( $126^\circ$  flip angle).

## 3. Measurements of ISMRM/NIST system $T_1$ and $T_2$ -spheres.

Previous work using the ISMRM/NIST system  $T_1$ -spheres had showed that the DREAM  $B_1+$  mapping sequence is only accurate for  $T_1$  values larger than approximately 300ms (Kato et al., 2019). Our  $B_1$ -field measurements with the DREAM sequence inside each  $T_1$ -sphere showed that this was also the case at 7T (Fig.3A). The  $B_1$ -field measured inside spheres  $T_1_7$  to  $T_1_{14}$  at 7T was reduced from the nominal  $B_1$  by more than 50%, in spheres  $T_1_5$  and  $T_1_6$  the value of  $B_1$  was reduced by 67 and 58% respectively, whilst for spheres  $T_1_1$  to  $T_1_4$  the  $B_1$  was above 80% of its nominal value.

One consideration for  $T_1$ -mapping with the MP2RAGE sequence is that the MP2RAGE signal intensity is not monotonic for the chosen acquisition parameters at 7T (which was based on the sequence described by Haast et al. 2018). Since the MP2RAGE signal intensity values in the lookup table do not have a discrete one-to-one correspondence for low  $T_1$ , some spheres may comprise voxels which are assigned  $T_1$  values on either side of the 540ms peak at 7T (Fig.3C), as it is the case for spheres  $T_1_5$  and  $T_1_6$  ( $\sim$ 400 and 290ms respectively) where some voxels have been clearly misclassified, as shown by the noisy map within these spheres in Fig.3B. Histograms of MP2RAGE  $T_1$ -values (Fig.3D) show two peaks for  $T_1_5$  and  $T_1_6$ , but also for  $T_1_4$  (this was also the case for  $T_2$  spheres  $T_2_7$ ,  $T_2_8$  and  $T_2_9$ ). Whenever two histogram

peaks were present, a cut-off  $T_1$ -value was applied to measure  $T_1$ -values only across the voxels contributing to the correct peak (based on the knowledge of expected  $T_1$  reference value).

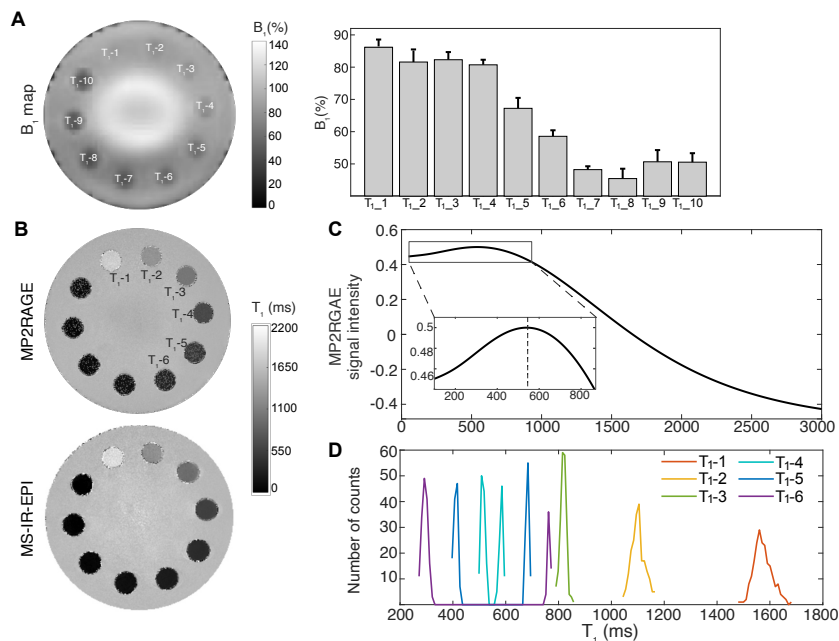

**Figure 3:** Results for ISMRM/NIST system  $T_1$  phantom at 7T. (A)  $B_1$ -map (%) collected using a DREAM and associated bar plot of  $B_1$  in each  $T_1$  sphere. Error bars represent standard deviation across voxels. Note the  $B_1$  in spheres  $T_{1-7}$  to  $T_{1-10}$  falls below 50%. (B)  $T_1$  maps obtained with the MP2RAGE (top) and MS-IR-EPI (bottom) scheme. (C) Look-up table of the MP2RAGE signal intensity versus  $T_1$ . The MP2RAGE signal intensity increases with increasing  $T_1$  values until  $\sim 540$ ms (dash line in inset) and then decreases with increasing  $T_1$  values, hence at low  $T_1$  there is not a discrete solution. As a result, spheres  $T_{1-5}$  and  $T_{1-6}$  have a MP2RAGE signal intensity which matches two different  $T_1$  values (one at either side of 540ms peak) and have been miss-classified. (D) Histograms of MP2RAGE  $T_1$ -values for spheres  $T_{1-1}$  to  $T_{1-6}$ . Notice that for spheres  $T_{1-1}$ ,  $T_{1-2}$  and  $T_{1-3}$  (red, yellow and green respectively) there is a single peak, whereas for spheres  $T_{1-4}$ ,  $T_{1-5}$  and  $T_{1-6}$  (cyan, blue and purple respectively) there are two peaks.

Details of mean  $T_1$  values (across sessions) measured in NIST  $T_1$  spheres at 3T and 7T for each  $T_1$ -mapping method, along with their respective  $\text{NiCl}_2$  concentration and reference 3T  $T_1$  values provided by NIST are provided in Table 1. Note a large variation of measured  $T_1$ -value is apparent in the  $T_{1-3}$  sphere across time (but consistent values were measured with all  $T_1$ -mapping methods for this sphere within a scan session);  $T_1$ -values measured using the standard single-slice IR sequence were  $966 \pm 17$ ms and  $820 \pm 19$ ms at 3T and 7T respectively for session 1, and  $1414 \pm 9$ ms and  $1227 \pm 9$ ms at 3T and 7T respectively in the scan session 9 months later. Hence, for the  $T_{1-3}$  sphere, the accuracy was evaluated based on the first measurement alone, while the coefficient of variation (CoV) was evaluated on the last four measurements acquired within a 10 day window.

Table 2 contains the corresponding information for the NIST  $\text{MnCl}_2$ -doped  $T_2$  spheres. Note that the reference  $T_1$  values for spheres  $T_{2-1}$  and  $T_{2-5}$  are reported with respect to known deviations of the  $\text{MnCl}_2$  concentration due to an error in the manufacturing process.

**Table 1:** Mean  $T_1$  values obtained in each NIST  $T_1$ -sphere for each  $T_1$ -mapping sequence. Mean across three measurements at 3T and across six measurements at 7T. For sphere  $T_{1\_3}$ , mean across voxels of a single measurement.

| Sphere Number    | NiCl <sub>2</sub> concentration | T <sub>1</sub> at 3T (ms) |         |           |         | T <sub>1</sub> at 7T (ms) |           |         |
|------------------|---------------------------------|---------------------------|---------|-----------|---------|---------------------------|-----------|---------|
|                  |                                 | Reference                 | IR-TSE  | MS-IR-EPI | MP2RAGE | IR-EPI                    | MS-IR-EPI | MP2RAGE |
| T <sub>1_1</sub> | 0.299                           | 1989±1.0                  | 2015±30 | 2039±49   | 1944±86 | 1760±32                   | 1768±44   | 1615±58 |
| T <sub>1_2</sub> | 0.623                           | 1454±2.5                  | 1386±16 | 1421±14   | 1415±63 | 1171±23                   | 1194±22   | 1144±27 |
| T <sub>1_3</sub> | 1.0720                          | 984.1±0.33                | 966±7   | 1034±47   | 985±18  | 820±19                    | 835±17    | 818±12  |
| T <sub>1_4</sub> | 1.720                           | 706±1.5                   | 694±5   | 711±7     | 650±32  | 555±5                     | 567±8     | 588±6   |
| T <sub>1_5</sub> | 2.617                           | 496.7±0.41                | 489±4   | 508±4     | 411±61  | 388±2                     | 407±18    | 406±7   |
| T <sub>1_6</sub> | 3.912                           | 351.5±0.91                | 364±4   | 364±4     | 372±29  | 406±7                     | 272±4     | 289±13  |

**Table 2:** Mean  $T_1$  values obtained in each NIST  $T_2$ -sphere for each  $T_1$ -mapping sequence. Reference values (batch #2) for 3T at 20°C. Mean across two measurements at 3T and across four measurements at 7T. No result shown for sphere  $T_{2\_10}$  for MP2RAGE at 7T as look-up table was constrained to  $T_1 > 300$ ms.

| Sphere Number     | MnCl <sub>2</sub> concentration | T <sub>1</sub> at 3T (ms) |         |           |         | T <sub>1</sub> at 7T (ms) |           |          |
|-------------------|---------------------------------|---------------------------|---------|-----------|---------|---------------------------|-----------|----------|
|                   |                                 | Reference                 | IR-TSE  | MS-IR-EPI | MP2RAGE | IR-EPI                    | MS-IR-EPI | MP2RAGE  |
| T <sub>2_1</sub>  | 0.0108                          | 3025±76                   | 2722±6  | 2795±47   | 2299±1  | 2880±78                   | 2972±104  | 2460±34  |
| T <sub>2_2</sub>  | 0.0181                          | 2186±55                   | 2030±13 | 2059±86   | 2081±45 | 2085±50                   | 2157±47   | 1937±106 |
| T <sub>2_3</sub>  | 0.0282                          | 1901±48                   | 1739±16 | 1806±52   | 1840±13 | 1779±33                   | 1840±42   | 1751±115 |
| T <sub>2_4</sub>  | 0.0434                          | 1550±39                   | 1399±28 | 1464±38   | 1515±29 | 1464±39                   | 1507±42   | 1422±78  |
| T <sub>2_5</sub>  | 0.0626                          | 1511±38                   | 1363±27 | 1415±44   | 1479±34 | 1421±36                   | 1451±49   | 1385±79  |
| T <sub>2_6</sub>  | 0.0934                          | 1026±26                   | 916±17  | 972±28    | 961±30  | 937±32                    | 973±31    | 937±30   |
| T <sub>2_7</sub>  | 0.1353                          | 805±20                    | 713±12  | 768±19    | 690±57  | 721±18                    | 765±16    | 755±14   |
| T <sub>2_8</sub>  | 0.193                           | 600±15                    | 512±11  | 575±12    | 473±25  | 531±11                    | 569±18    | 575±31   |
| T <sub>2_9</sub>  | 0.2768                          | 431±11                    | 352±7   | 401±4     | 341±9   | 365±4                     | 399±24    | 428±10   |
| T <sub>2_10</sub> | 0.4276                          | 293±7                     | 233±4   | 267±10    | 306±12  | 237±14                    | 281±29    | -        |

#### 4. Alternative method for correction of MT effects from the $T_1$ quantification

An alternative method to compute the  $b/a$  parameter maps is to reduce the amount of fat suppression pulses, rather than varying the FA of the SPIR fat suppression pulse. On one subject we performed two acquisitions using SPIR fat suppression pulse with FA=90°, one in which the SPIR pulse was applied prior to each RF acquisition (all) and one in which a SPIR pulse was applied prior to every alternate RF acquisition (alternate), hence using 50% of the number of FS pulses. Additional acquisitions were performed with a set of SPIR pulses of nominal FA=[0°, 30°, 45°, 60°, 78°] applied prior to each RF acquisition. Figure 4 shows comparison of voxel wise correction methods in the absence of a  $B_1$ -map. Notice similar histogram for data with FS flip angle of 45° (yellow) and data with alternate FS pulses of 90° flip angle (grey). The  $b/a$  parameter maps were spatially smoothed by a Gaussian kernel with a full width at half maximum (FWHM) of 2mm prior to correction to improve the SNR of the corrected  $R_1$ -maps. Notice that the corrected histograms are wider (Fig4B.ii,iii) when only two data sets (instead of 4) are used for correction. Figure 4C shows original and corrected  $R_1$ -maps for each method. The red arrowhead indicates a region of hyperintensity in the uncorrected  $R_1$ -maps (due to spectrally selective FS pulse causing attenuation of the proton signal), which is more evident for FS pulses with higher flip angles. The

corrected  $R_1$ -maps however are homogeneous across the brain as the spatial variations are reflected (and corrected) by the fitted voxelwise  $b/a$  parameter map.

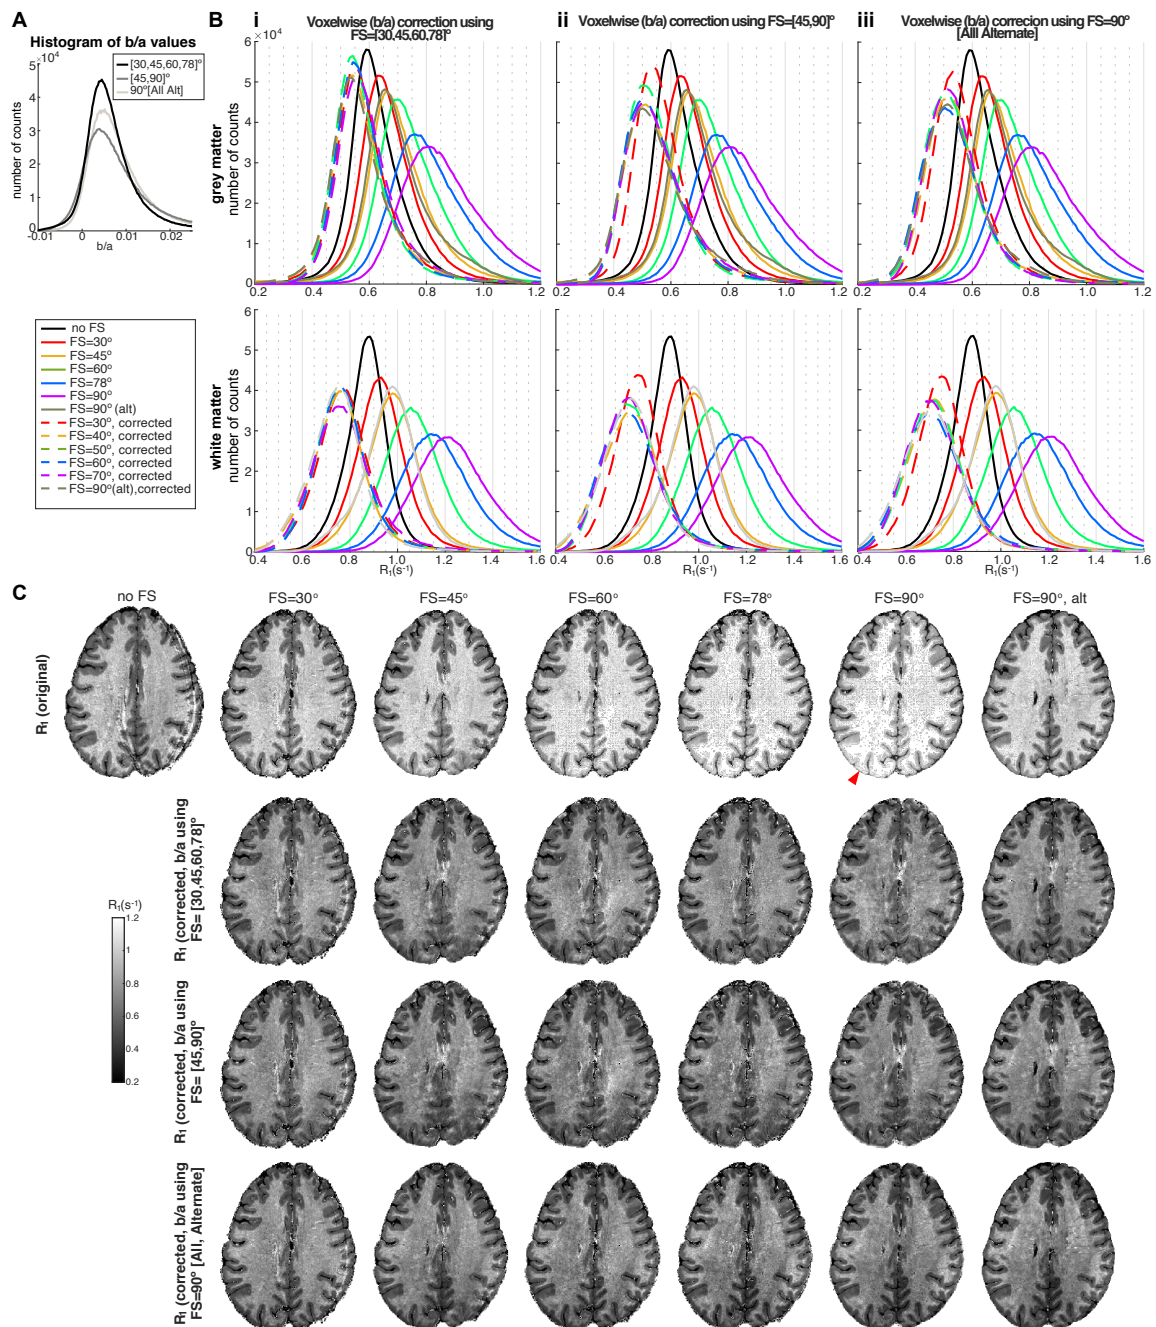

**Figure 4:** (A) Histogram of  $b/a$  values obtained by linear regression of  $R_1$  versus SPIR flip angle when considering datasets comprising 4 FS flip angles of 30°, 45°, 60°, and 78° (black line), 2 FS flip angles of 45° and 90° (dark grey), data acquired with FS flip angle of 90° either prior to all acquisitions or prior to every other acquisition [All Alternate]. (B)  $R_1$  histograms for grey matter (top) and white matter (bottom) from data acquired with different levels of fat suppression (solid colour lines) compared to data acquired with no fat suppression (black line) and corresponding  $R_1$  histograms after correction (dashed lines) using  $b/a$  parameter maps generated from (i) 4 FS flip angles [30°, 45°, 60°, and 78°], (ii) 2 FS flip angles [45° and 90°] and (iii) FS flip angle of 90° prior to all or alternate excitation pulses. (C) Original  $R_1$ -maps (first row) shown for the different SPIR flip angles and corresponding  $R_1$ -maps after correction with  $b/a$  map derived from the three different methods.

## 5. $b/a$ parameter estimation results for subjects 4 and 5 (section 3.5)

Five subjects participate in the experiment to compare MS-IR-EPI with single slice IR-EPI in a single slice and MP2RAGE across the whole brain. Subject specific  $b/a$  parameter values were available for subjects 1, 2 and 3, who had participated in the experiment to model the impact of FS pulses (Section 2.2.1). For subjects 4 and 5, the  $b/a$ -parameter map was estimated from two data sets acquired with SPIR flip angles of  $40^\circ$  and  $70^\circ$ . Figure 5 plots histograms of  $b/a$  parameter values measured for subjects 3 and 4. The  $b/a$  parameter for the global correction was computed from the two Gaussian mixture fit, using the mode (peak) of the highest amplitude Gaussian (0.0043 and 0.0042 for subjects 3 and 4 respectively).

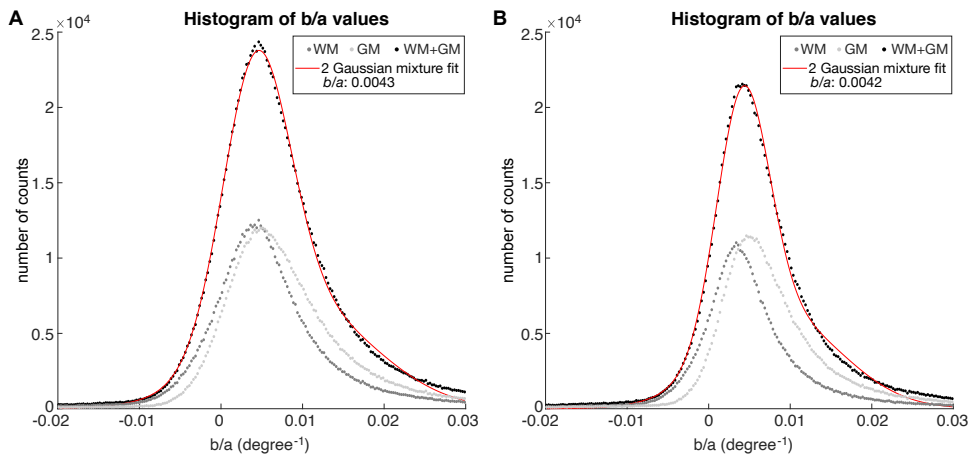

**Figure 5:** Histogram of  $b/a$  parameter values obtained by linear regression of  $R1$  versus SPIR FS flip angle for GM tissue (dark grey), WM tissue (light grey) and total (GM+WM) tissue (black) for (A) subject 4 and (B) subject 5. Red line: two Gaussian mixture fit to the (GM+WM) data.

## 6. LCPC denoising of high spatial resolution data

Complex denoising was performed using a local complex principal component analysis (LCPCA) technique (Bazin et al., 2019) which has been shown to efficiently improve SNR of MR images acquired at the lower limit of SNR. Figure 6A shows the effect of de-noising for an example slice acquired at very high spatial resolution ( $0.35 \times 0.35 \times 0.7 \text{mm}^3$ ) with MS-IR-EPI (acquired at inversion time of 495ms) using the surface coil. The SNR improvement is very clear, particularly for the cerebellum where SNR was very low due to the positioning of the surface coil. The SNR improvement is not so dramatic for the derived  $T_1$ -map (Figure 8 in main manuscript), probably due to the SNR improvement when combining the individual acquisitions ( $n=15$ ) to compute the  $T_1$ -map. Cortical profiles extracted from the  $T_1$  and  $M_0$  maps derived before and after de-noising are very similar (Fig. 6B).

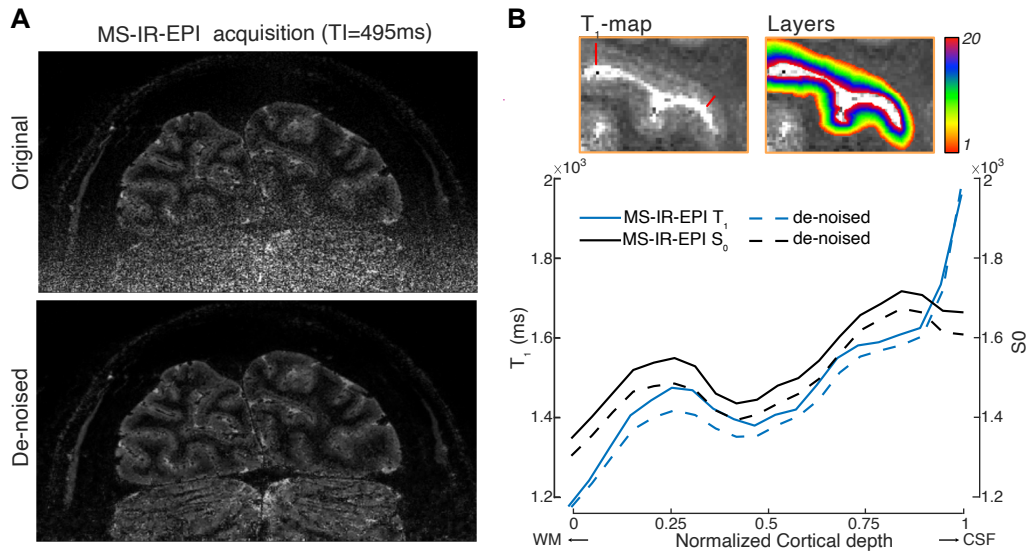

**Figure 6:** (A) High spatial resolution ( $0.35 \times 0.35 \times 0.7 \text{mm}^3$ ) MS-IR-EPI data ( $TR=3.2\text{s}$ ,  $TE=20\text{ms}$ , EPI factor= 13, 35 slices, offsets=[0,7,14,21,28], 3 averages, 11min 8s total acquisition time) for an example slice acquired with  $TI=495\text{ms}$  before (top) and after (bottom) complex de-noising. (B) Cortical profiles for original (solid lines) and de-noised (dash lines) fitted  $T_1$  (blue) and  $M_0$  (black) maps: mean across profiles between the two boundaries indicated by the red lines in the  $T_1$ -map inset (top left). Cortical depths derived using the equi-volume approach are shown in the top left corner.
